# Supplementary material for: Engineering the Catalytic Properties of Two-Domain Laccase from Streptomyces griseoflavus Ac-993
Source: MDPI journal article supplement (doi:10.3390/ijms23010065), 2021-12-22
Supplement: s1 [file s1]

**Table S1.** Kinetic parameters of 2.6-DMP oxidation by His165Ala and Arg240His mutant forms.

| substrate | protein   | pH optima | K <sub>m</sub> (mM) | k <sub>cat</sub> (s <sup>-1</sup> ) | k <sub>cat</sub> /K <sub>m</sub> (s <sup>-1</sup> mM <sup>-1</sup> ) |
|-----------|-----------|-----------|---------------------|-------------------------------------|----------------------------------------------------------------------|
| 2.6-DMP   | SgfSLwt   | 9.0       | 0.32±0.08           | 0.35±0.02                           | 1.09                                                                 |
|           | His165Ala | 9.0       | 0.18±0.03           | 0.19±0.006                          | 1.06                                                                 |
|           | Arg240His | 9.0       | 1.09±0.15           | 1.28±0.06                           | 1.17                                                                 |

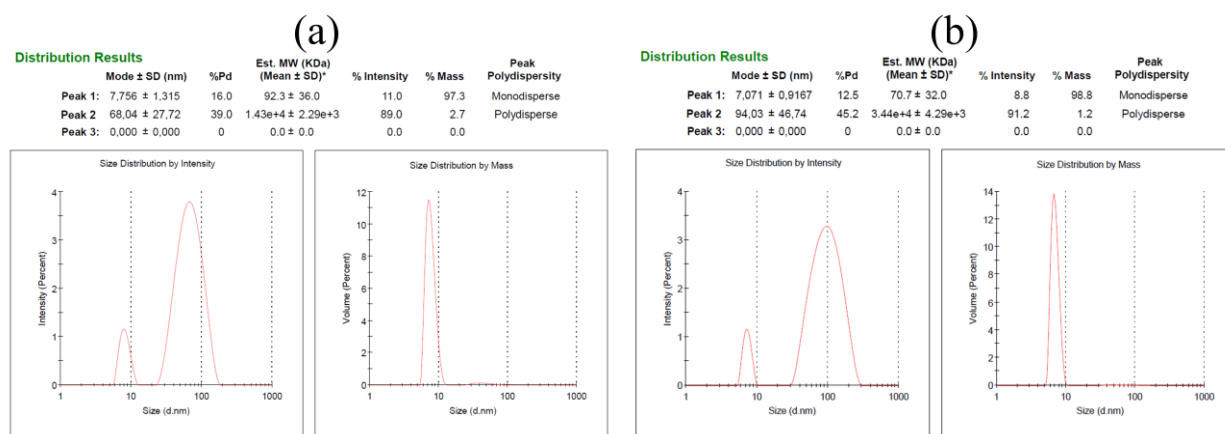

**Figure S1.** Dynamic light scattering peaks and reports of SgfSLwt (a) and Met199Gly (b) samples after the high-temperature incubation.
